# Supplementary figures and images for: Discrimination of patients with type 2 myocardial infarction
Source: Oxford University Press journal article supplement (doi:10.1093/eurheartj/ehx457), 2017-07-20

T1MI T2MI

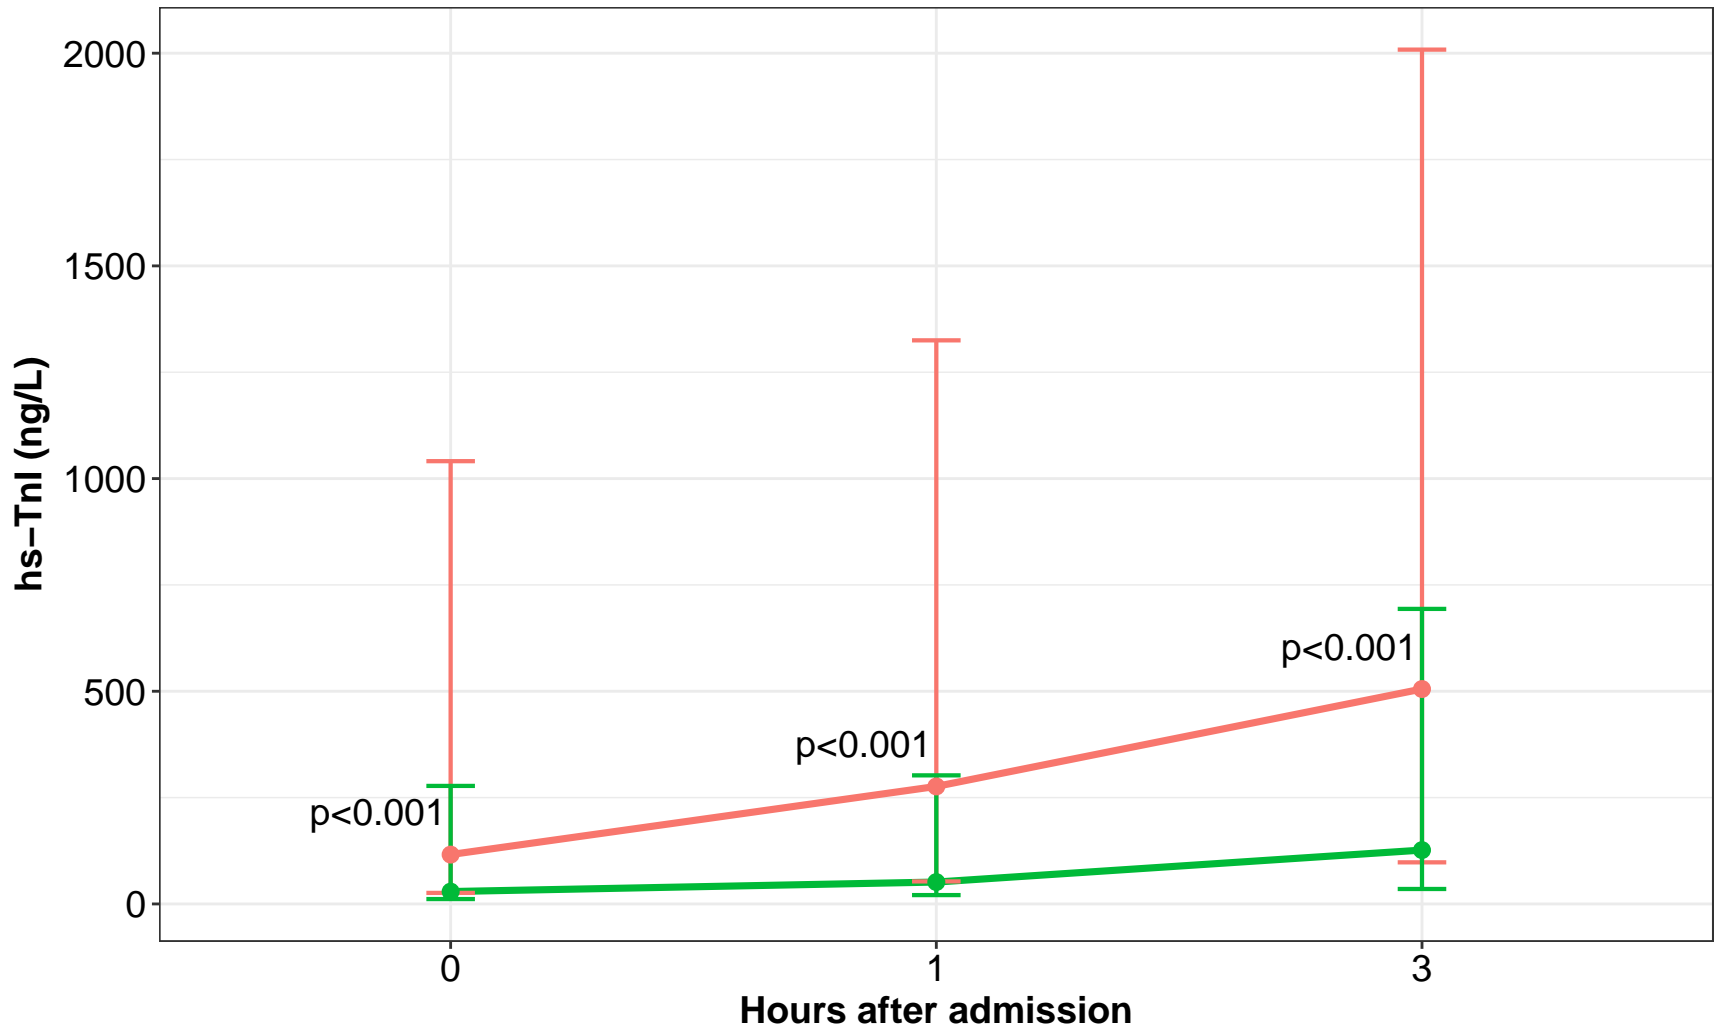

Supplement: ehx457_suppfig1.pdf [file ehx457_suppfig1.pdf]

**0 hour**

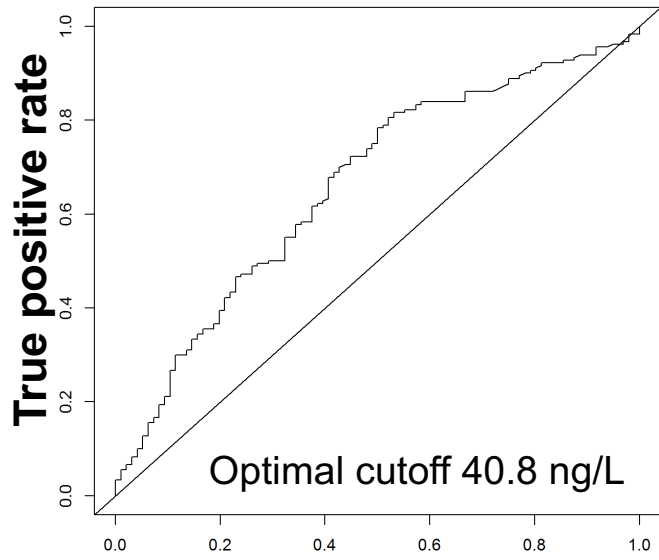

**1 hour**

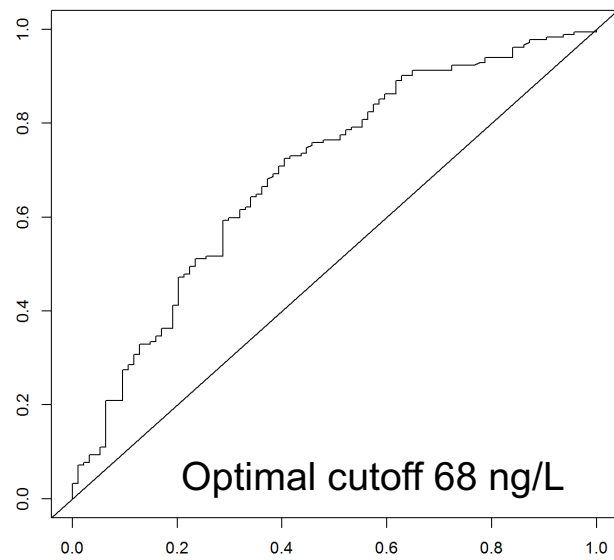

**3 hours**

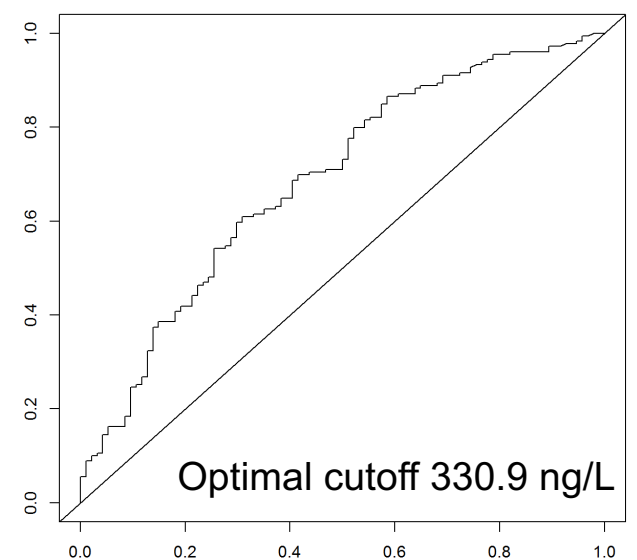

**False positive rate**

Supplement: ehx457_suppfig2.pdf [file ehx457_suppfig2.pdf]

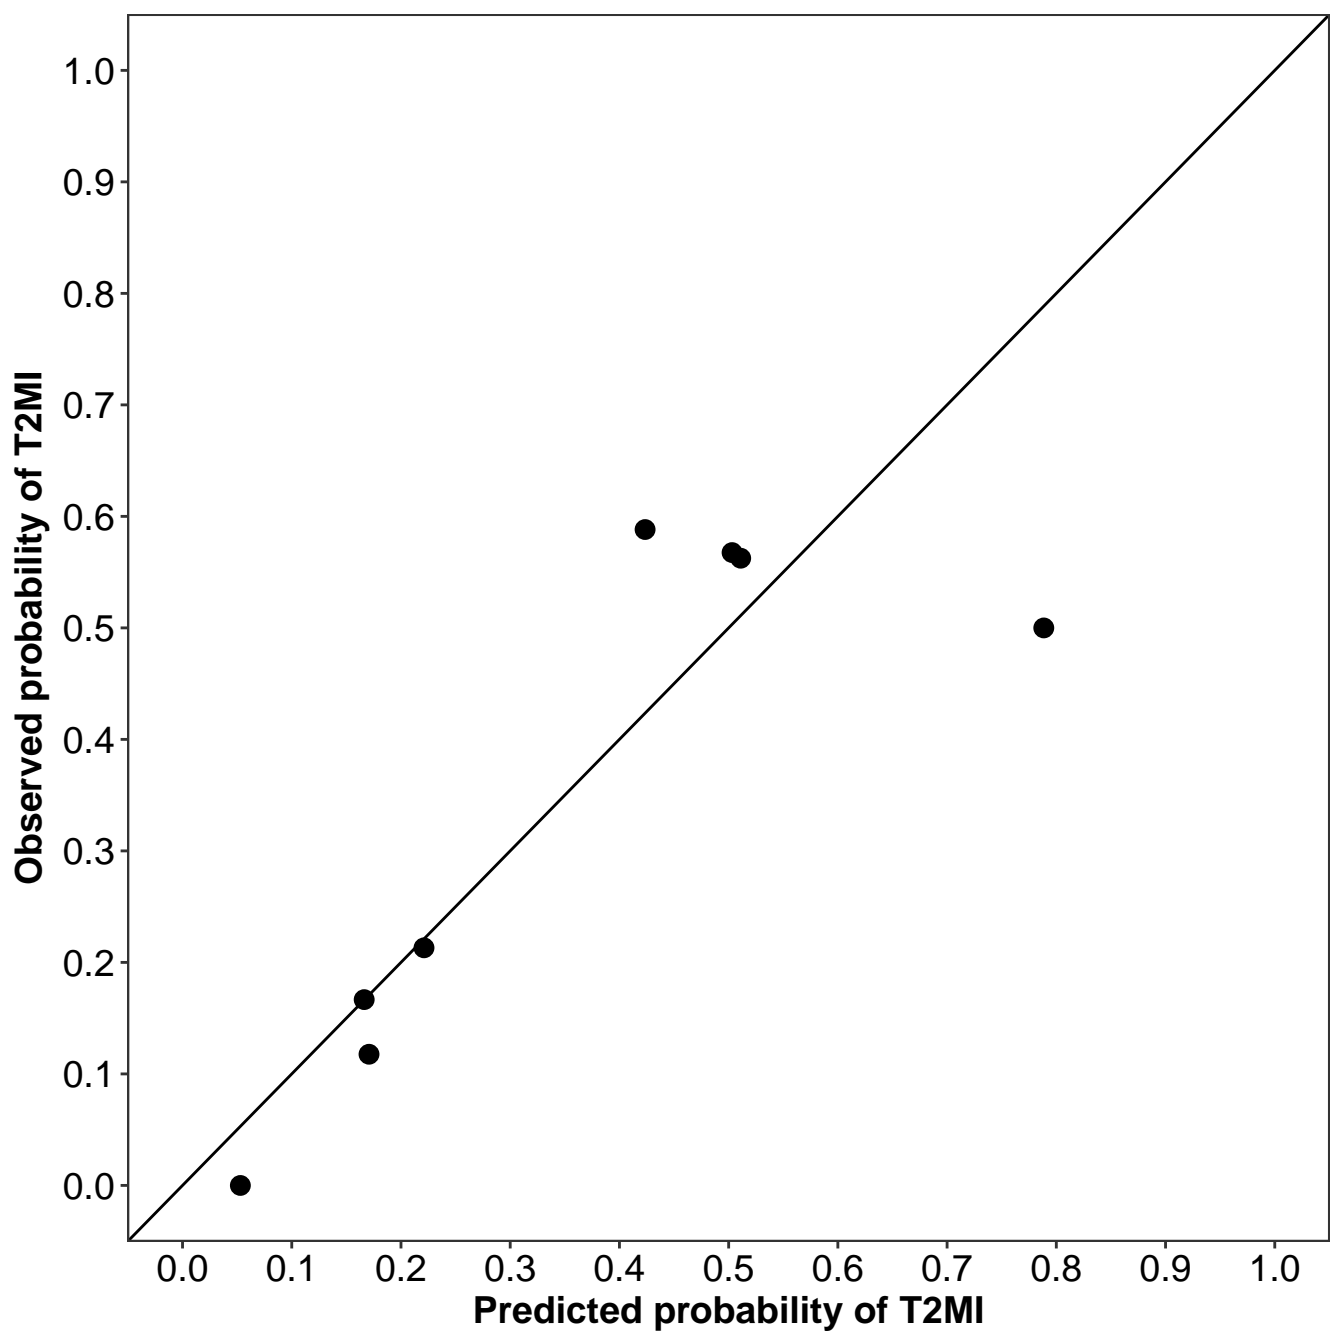

Supplement: ehx457_suppfig3.pdf [file ehx457_suppfig3.pdf]

**ROC curve of the score to predict the probability of T2MI**

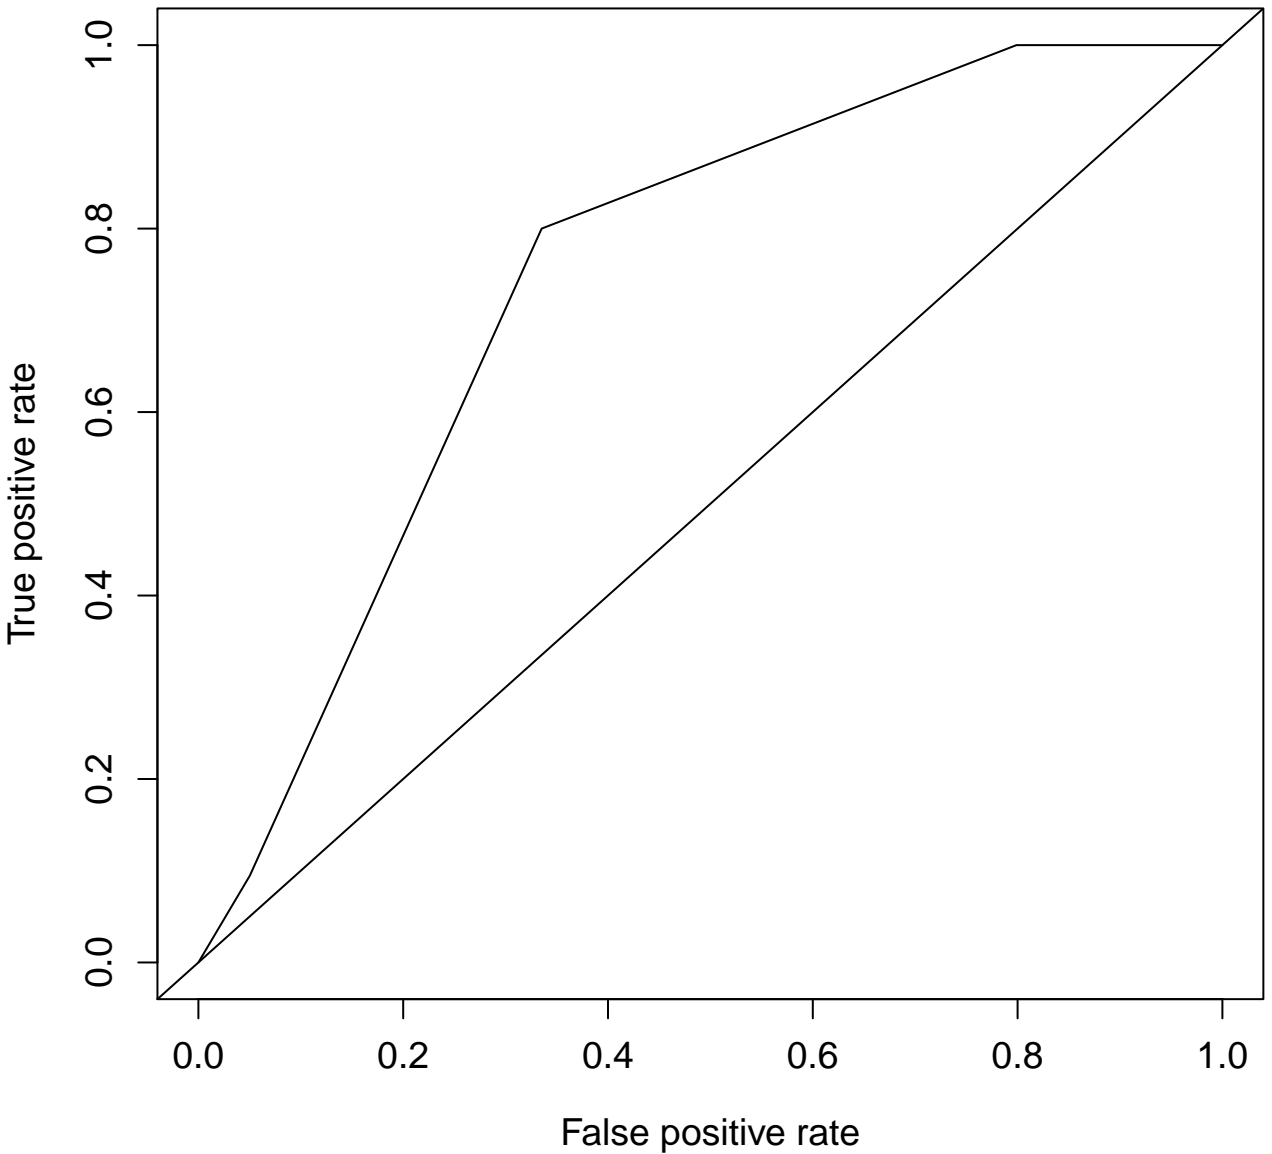

Supplement: ehx457_suppfig4.pdf [file ehx457_suppfig4.pdf]
